# Supplementary material for: Assessing the adaptive role of cannabidivarinic acid (CBDVA) in aphid defense in Cannabis sativa
Source: J Cannabis Res. 2025 Jun 11;7:34. doi: 10.1186/s42238-025-00291-x (PMC12153158; doi:10.1186/s42238-025-00291-x)
Supplement: Supplementary file 1 — Supplementary Material 1 [file 42238_2025_291_MOESM1_ESM.docx]

**Supplemental Table 1.** Statistical analysis of cannabis aphid populations on high- and low-CBDVA hemp genotypes

|  | **Day 0** | **Day 7** | **Day 10** | **Day 14** |
| --- | --- | --- | --- | --- |
| **S1** | 5.00 ± 0.00a | 16.50 ± 5.56b | 14.17 ± 4.31c | 12.58 ± 3.53b |
| **Carolina Dream** | 5.00 ± 0.00a | 31.11 ± 5.27ab | 36.89 ± 6.21bc | 85.78 ± 20.11a |
| **WI-M-H-19-00100** | 5.00 ± 0.00a | 20.5 ± 2.06b | 29.13 ± 5.13bc | 65.75 ± 16.41ab |
| **WI-M-H-19-00101** | 5.00 ± 0.00a | 30.14 ± 5.80ab | 56.14 ± 4.65ab | 101.71 ± 15.00a |
| **WI-M-H-19-00102** | 5.00 ± 0.00a | 78.57 ± 10.59a | 127.00 ± 23.82a | 221.57 ± 37.27a |
| **Carmagnola OP** | 5.00 ± 0.00a | 30.00 ± 5.11ab | 71.20 ± 15.30ab | 162.90 ± 39.35a |
| **H-statistic** | n/a | 22.67 | 32.76 | 31.04 |
| ***P-value*** | n/a | *0.004* | *<0.0001* | *<0.0001* |

Overall model analysis was performed with Kruskal-Wallis at each time point. Comparisons in each timepoint were performed with Dunn’s post-hoc test. The different letters indicate significance at *P* < 0.05.

**Supplemental Table 2.** Statistical analysis of trichome density on high- and low-CBDVA genotypes

|  | **S1** | **WI-M-H-19-00102** | **t** | ***P*** |
| --- | --- | --- | --- | --- |
| **Leaf 2** | 63.71 ± 3.48 | 48.29 ± 3.08 | 3.32 | ***0.003*** |
| **Leaf 3** | 85.86 ± 2.47 | 72.29 ± 5.57 | 2.23 | ***0.023*** |
| **Leaf 4** | 93.71 ± 3.12 | 71.57 ± 5.61 | 3.45 | ***0.0024*** |
| **Leaf 5** | 111.00 ± 9.42 | 71.67 ± 7.35 | 3.35 | ***0.0043*** |
| **Node 1** | 142.90 ± 13.20 | 122.10 ± 16.73 | 0.97 | *0.18* |
| **Node 2** | 216.40 ± 27.47 | 145.90 ± 16.68 | 2.20 | ***0.024*** |
| **Node 3** | 218.40 ± 10.84 | 111.90 ± 17.84 | 5.11 | ***0.0001*** |
| **Node 4** | 219.80 ± 34.75 | 120.60 ± 22.71 | 2.46 | ***0.016*** |

Analysis was performed using an unpaired one-tailed t-test Bold indicates significant differences between treatments at *P* < 0.05.

|  | **Day 1** | | **Day 2** | | **Day 3** | | **Day 4** | |
| --- | --- | --- | --- | --- | --- | --- | --- | --- |
| Adults | Nymphs | Adults | Nymphs | Adults | Nymphs | Adults | Nymphs |
| **Diet** | 10.00 ± 0.00a | 21.00 ± 3.00a | 10.00 ± 0.00a | 59.78 ± 4.49a | 10.00 ± 0.00a | 87.33 ± 5.01a | 9.56 ± 0.44a | 109.60 ± 10.01a |
| **DMSO** | 9.89 ± 0.11a | 11.78 ± 3.04ab | 9.78 ± 0.15a | 45.89 ± 6.15ab | 9.78 ± 0.15a | 59.56 ± 5.10b | 9.00 ± 0.53a | 52.67 ± 7.79b |
| **1 mM CBDVA** | 9.79 ± 0.11a | 2.14 ± 0.43c | 8.79 ± 0.24b | 9.71 ± 2.33c | 7.5 ± 0.40b | 18.79 ± 3.72c | 6.57 ± 0.52b | 18.71 ± 5.21c |
| **0.5 mM CBDVA** | 10.00 ± 0.0a | 15.44 ± 2.37ab | 9.67 ± 0.17a | 30.00 ± 5.41b | 5.22 ± 0.91c | 39.78 ± 8.64bc | 5.22 ± 0.89b | 31.44 ± 7.04bc |
| **0.1 mM CBDVA** | 9.78 ± 0.22a | 10.44 ± 2.71bc | 9.56 ± 0.24ab | 47.00 ± 5.03ab | 9.44 ± 0.24a | 65.78 ± 10.29ab | 9.33 ± 0.24a | 101.70 ± 7.25a |
| **F-statistic** | 0.79 | 10.79 | 6.42 | 21.13 | 17.99 | 17.69 | 11.06 | 32.65 |
| ***P-value*** | *0.54* | *<0.0001* | *0.0004* | *<0.0001* | *<0.0001* | *<0.0001* | *<0.0001* | *<0.0001* |

**Supplemental Table 3.** Statistical analysis of cannabis aphid performance on artificial diets

Overall model analysis was performed with one-way ANOVA at each timepoint. Comparisons in each timepoint were performed with Tukey’s HSD post-hoc test, different letters indicate significance at *P* < 0.05.

|  | **Day 1** | | **Day 2** | | **Day 3** | |
| --- | --- | --- | --- | --- | --- | --- |
| Adults | Nymphs | Adults | Nymphs | Adults | Nymphs |
| **Diet** | 10.00 ± 0.00a | 19.40 ± 3.38a | 9.60 ± 0.22a | 47.50 ± 5.40a | 9.40 ± 0.27a | 75.00 ± 6.92a |
| **DMSO** | 9.90 ± 0.10a | 14.10 ± 2.82a | 9.40 ± 0.40a | 45.10 ± 5.60a | 9.30 ± 0.40a | 72.50 ± 7.03a |
| **0.5 mM CBDVA** | 9.40 ± 0.31a | 1.80 ± 0.77b | 7.00 ± 0.75b | 5.20 ± 1.26b | 6.10 ± 0.64b | 11.60 ± 2.60b |
| **F-statistic** | 3.00 | 12.24 | 8.22 | 27.26 | 16.57 | 37.17 |
| ***P-value*** | *0.066* | *0.0002* | *0.0016* | *<0.0001* | *<0.0001* | *<0.0001* |

Overall model analysis was performed with one-way ANOVA at each timepoint. Comparisons in each timepoint were performed with Tukey’s HSD post-hoc test, different letters indicate significance at *P* < 0.05.

**Supplemental Table 4.** Statistical analysis of green peach aphid performance on artificial diets


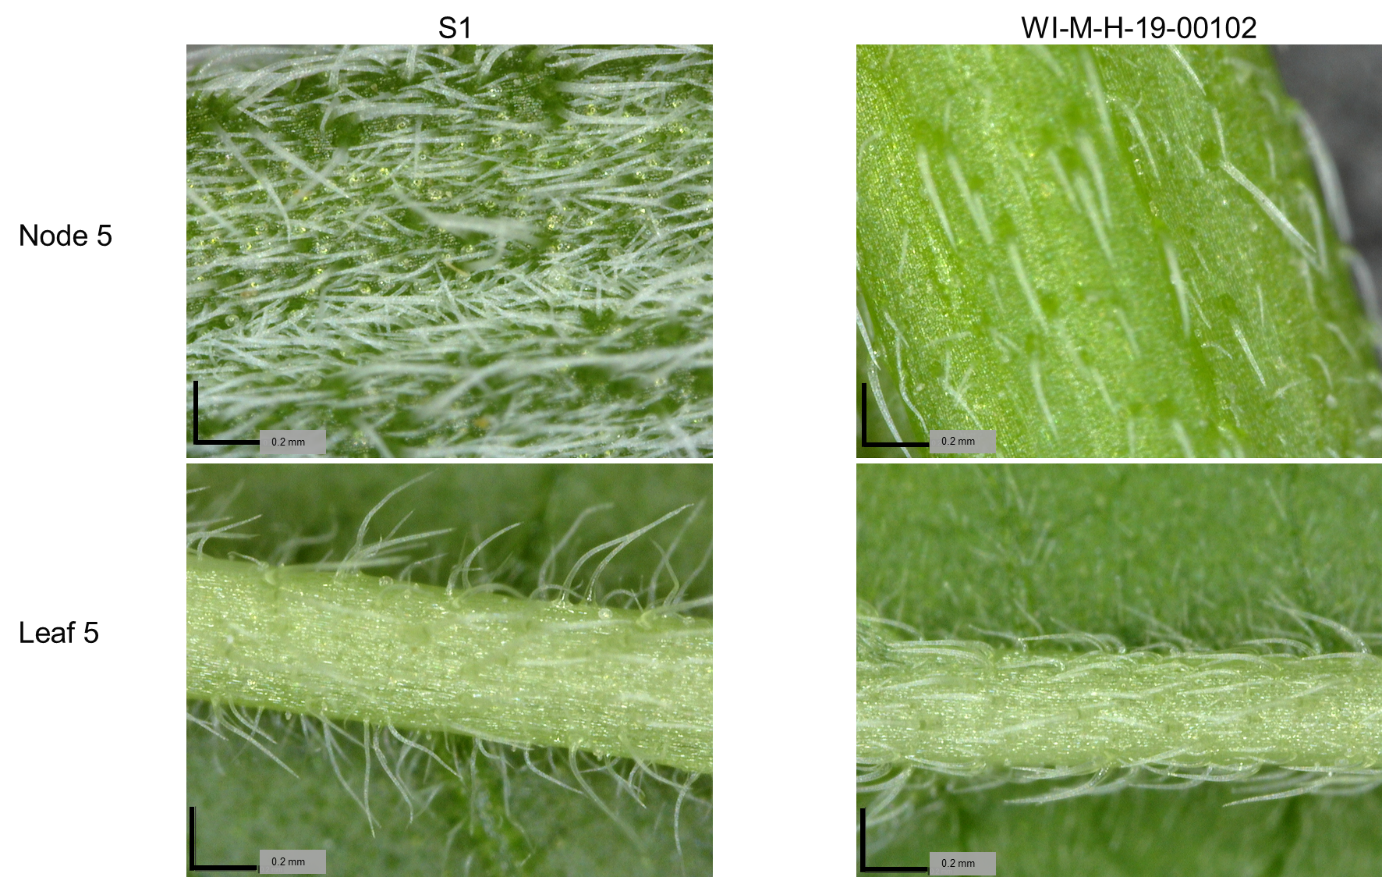


**Supplemental Figure 1.** Observed differences in trichome density and morphology between S1 and WI-M-H-00102 at leaf 5 and node 5 with a Dino-Lite handheld microscope at 225X magnification.
